# Supplementary material for: Associations between superoxide dismutase, malondialdehyde and all-cause mortality in older adults: a community-based cohort study
Source: PubMed Central journal article supplement (PMC6466801; doi:10.1186/s12877-019-1109-z), 2019-04-15
Supplement: 12877_2019_1109_MOESM1_ESM.pdf [file 12877_2019_1109_MOESM1_ESM.pdf]

## Additional file 1

Additional Figure 1. Kaplan–Meier plot showing the all-cause mortality by quintiles of superoxide dismutase in women

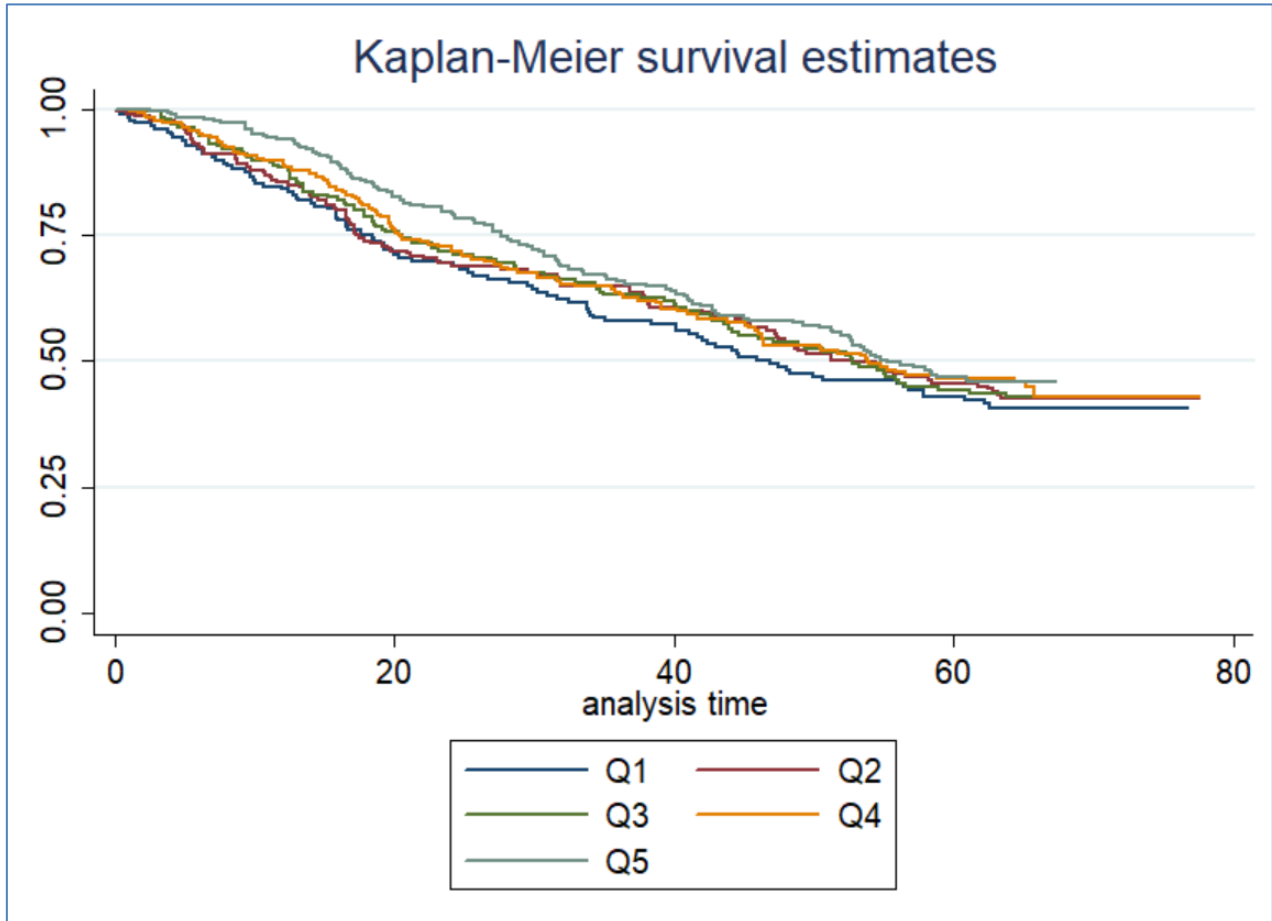

log-rank test  $p=0.51$
